# Supplementary material
Source: ML conference proceedings conference paper supplement (https://proceedings.neurips.cc/paper_files/paper/2020/hash/32508f53f24c46f685870a075eaaa29c-Abstract.html)
Supplement: Supplementary file [file 32508f53f24c46f685870a075eaaa29c-Supplemental.pdf]

---

# Supplementary Material

## Unsupervised Learning of Object Landmarks via Self-Training Correspondence

---

**Dimitrios Mallis**  
University of Nottingham  
dimitrios.mallis@nottingham.ac.uk

**Enrique Sanchez**  
Samsung AI Center, Cambridge, UK  
e.lozano@samsung.com

**Matt Bell**  
University of Nottingham  
matt.bell@nottingham.ac.uk

**Georgios Tzimiropoulos**  
Queen Mary University of London, UK  
Samsung AI Center, Cambridge, UK  
g.tzimiropoulos@qmul.ac.uk

This supplementary material includes some implementation and evaluation details that were not included in the paper due to space constraints, a detailed description of the datasets used to evaluate our approach, and further qualitative results in all datasets.

### 1 Further Implementation Details

**Experimental setup for ablation study:** We report a set of experiments on the ablation study investigating robustness to label noise and impact of number of clusters (Section 4 in the main submission). To perform these experiments, we populate each image with an initial set of points, mixed from a pool of ground-truth landmarks and a set of randomly chosen points. The initial number of points per image is randomly chosen to be between 12 and 24, so as to simulate the number of keypoints that are usually returned by SuperPoint. The ground-truth keypoint locations are sampled uniformly from a subset of 15 facial landmarks (3 on the nose and mouth, 2 on each eye and eyebrow and 1 on the jaw), while the remaining points are random 2D locations inside the facial bounding box. The ground-truth points are also randomly distorted within a 3 pixels radius.

To assess the quality of the pseudo-annotations produced by the first step of our approach (i.e. after the end of the step described in Section 3.2 in the main submission), the detector and descriptor head of our model are evaluated separately. Since the real ground-truth keypoints are sampled from a very specific subset of landmarks, an ideal detector would detect these 15 points in every image and filter out all noise. To evaluate how close our detector is from the ideal one we measure precision and recall combined with F-measure. F-measure for training with varying mixtures of ground-truth and random keypoints is reported in Fig. 2 (d) of the main submission.

To evaluate the descriptor part of the network we assess the information shared between the clustering assignments produced by our framework and the ground-truth landmark label for each detected keypoint. For a particular keypoint, the landmark label is that of the ground-truth to which it is maximally assigned, and the the clustering label is that assigned by the clustering of the corresponding descriptors. We measure the Normalized Mutual Information between the landmark and clustering assignments. This measure, that is independent of the number of clusters, can quantify the degree of which one assignment is predictable of the other. Normalized Mutual information of clustering assignments produced for the different settings examined in the ablation study are reported in Fig. 2 (c), (d), (e).

**Initialization quality:** To further validate that SuperPoint is a better choice of initialization than R2D2, we measure the recall provided by the initial keypoints w.r.t ground-truth points (3 on the nose

and mouth, 2 on each eye and eyebrow). The obtained recall was 0.42 and 0.29 for SuperPoint and R2D2, respectively showing that SuperPoint yields a stronger initialization. Moreover, Superpoint provides over 40% recall, that was shown in paragraph **Robustness to noise** of the ablation study in the main paper to be sufficient for our approach to recover the correct correspondence through self-training.

## 2 Datasets

Our approach was evaluated over the following datasets.

**CelebA-MAFL:** CelebA [6] dataset of about 200K facial images annotated for 5 facial landmarks. Following standard practice we evaluate our method on the MAFL subset, which is excluded from the training split. Calculation of the forward and backward error curves is performed w.r.t. 68 standard facial landmarks that are recovered using the highly accurate method of [1].

**AFLW:** AFLW [5] contains 10, 112 training images and 2, 991 test images annotated for 21 landmarks annotated based on visibility. Similar to CelebA, calculation of the forward and backward error curves is performed w.r.t. 68 standard facial landmarks that are recovered using [1].

**LS3D:** LS3D [1] is a dataset of large pose facial images constructed by annotating the images from 300W-LP [11], AFLW [5], 300VW [8], 300W [7] and FDDB [4] in a consistent manner with 68 points using the automatic method of [1]. Note that LS3D dataset is annotated with 3D points. Evaluation is performed on the LS3D-W Balanced test set including an equal number of images for yaw angles of  $[0^\circ - 30^\circ]$ ,  $[30^\circ - 60^\circ]$ ,  $[60^\circ - 90^\circ]$ .

**Cat heads:** Cat heads [9] contains images of cats annotated for 9 facial landmarks, 2 for the eyes, 1 for the mouth and 3 for each ear. The dataset is divided into 7 disjoint folders. We used 6 for training ( $\sim 8750$  images) and 1 for testing ( $\sim 1250$  images).

**BBCPose.** BBCPose [2] is a dataset of 20 sign language videos annotated with 7 human pose landmarks (head, wrists, elbows, and shoulders). Evaluation is performed on the standard test set of 1000 images.

**Human3.6M.** Human3.6M [3] is an activity dataset with a constant background containing videos of actors in multiple poses under different viewpoints. Similarly to [10] we use all 7 subjects of the training set: 6 subjects were used to train our model and 1 was used for testing.

## 3 Qualitative results

For qualitative results on various datasets please see the figures in the following pages.



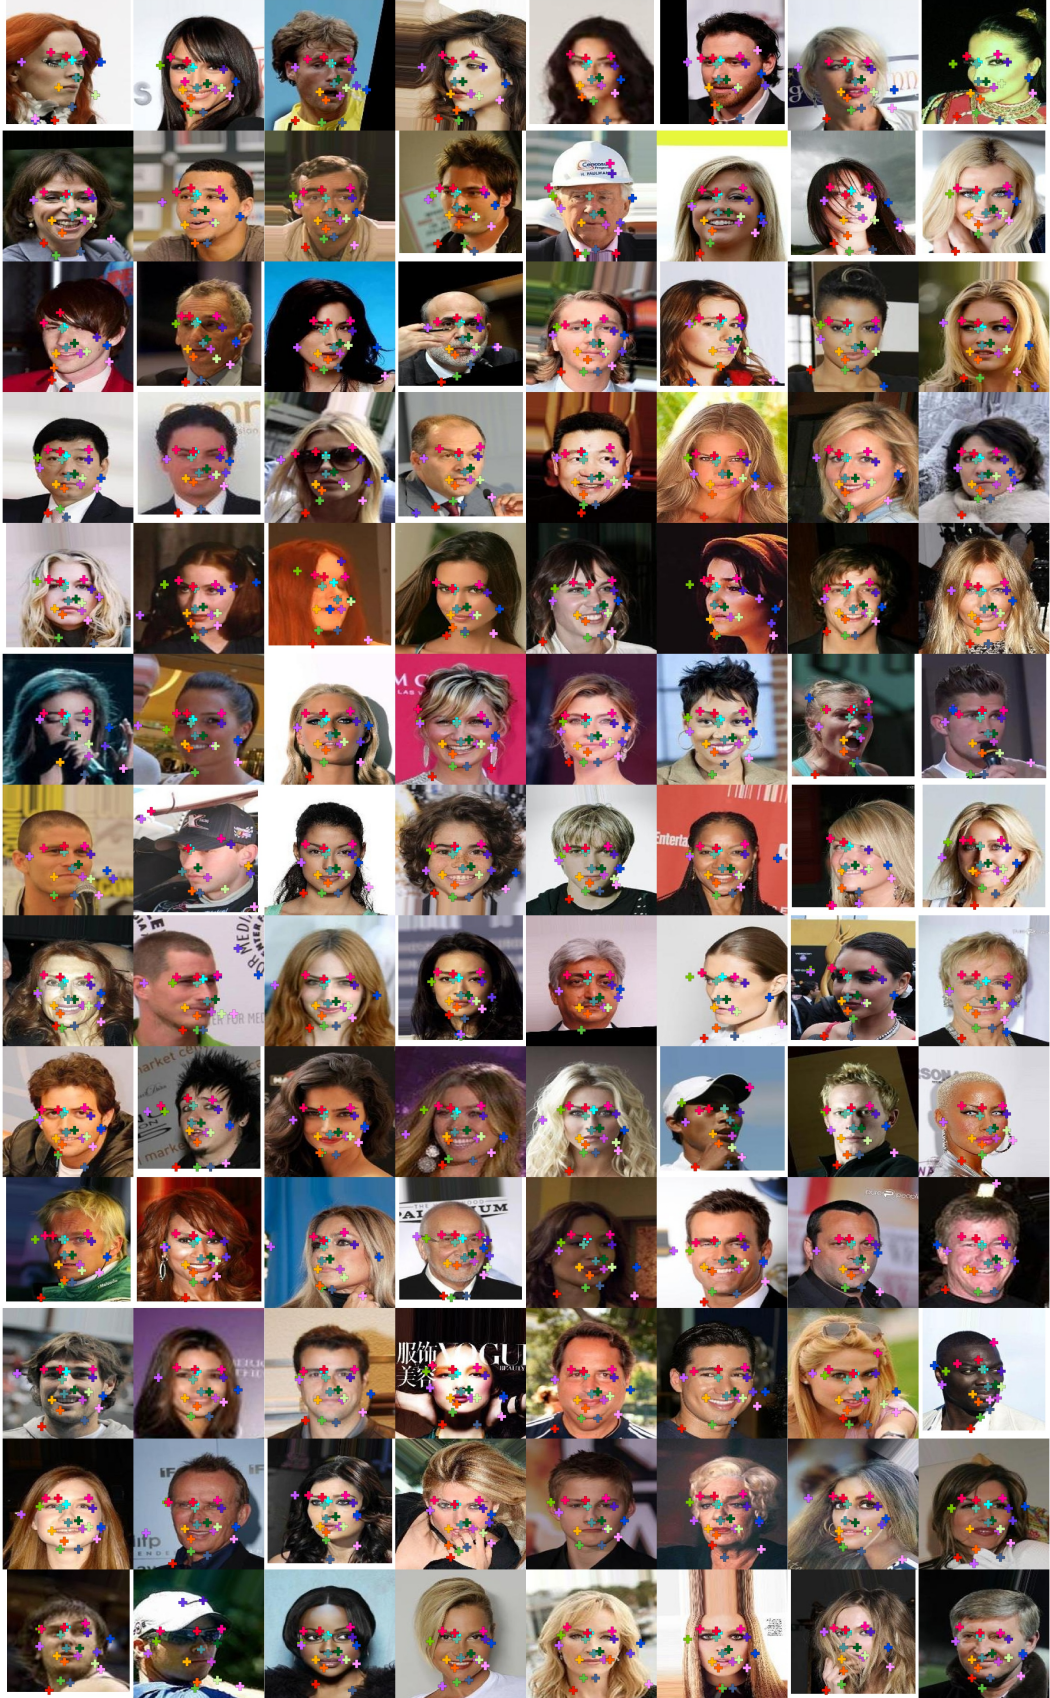

Figure 1: Qualitative results on MAFL



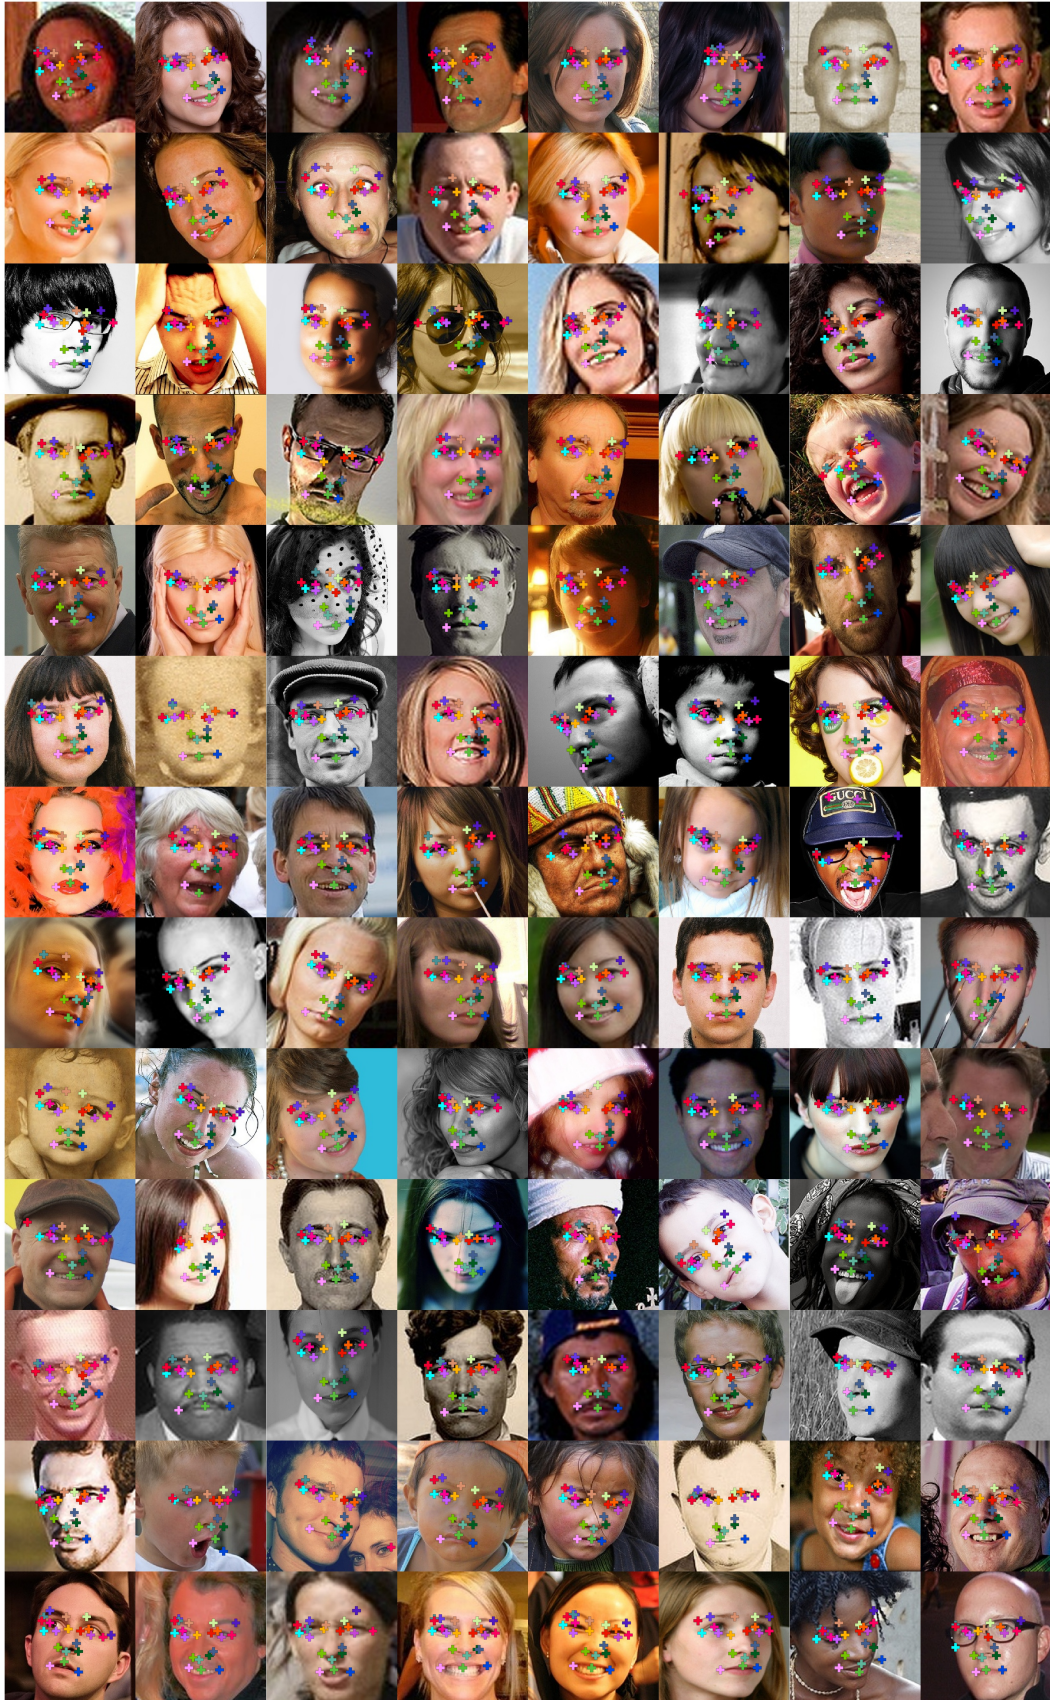

Figure 2: Qualitative results on AFLW



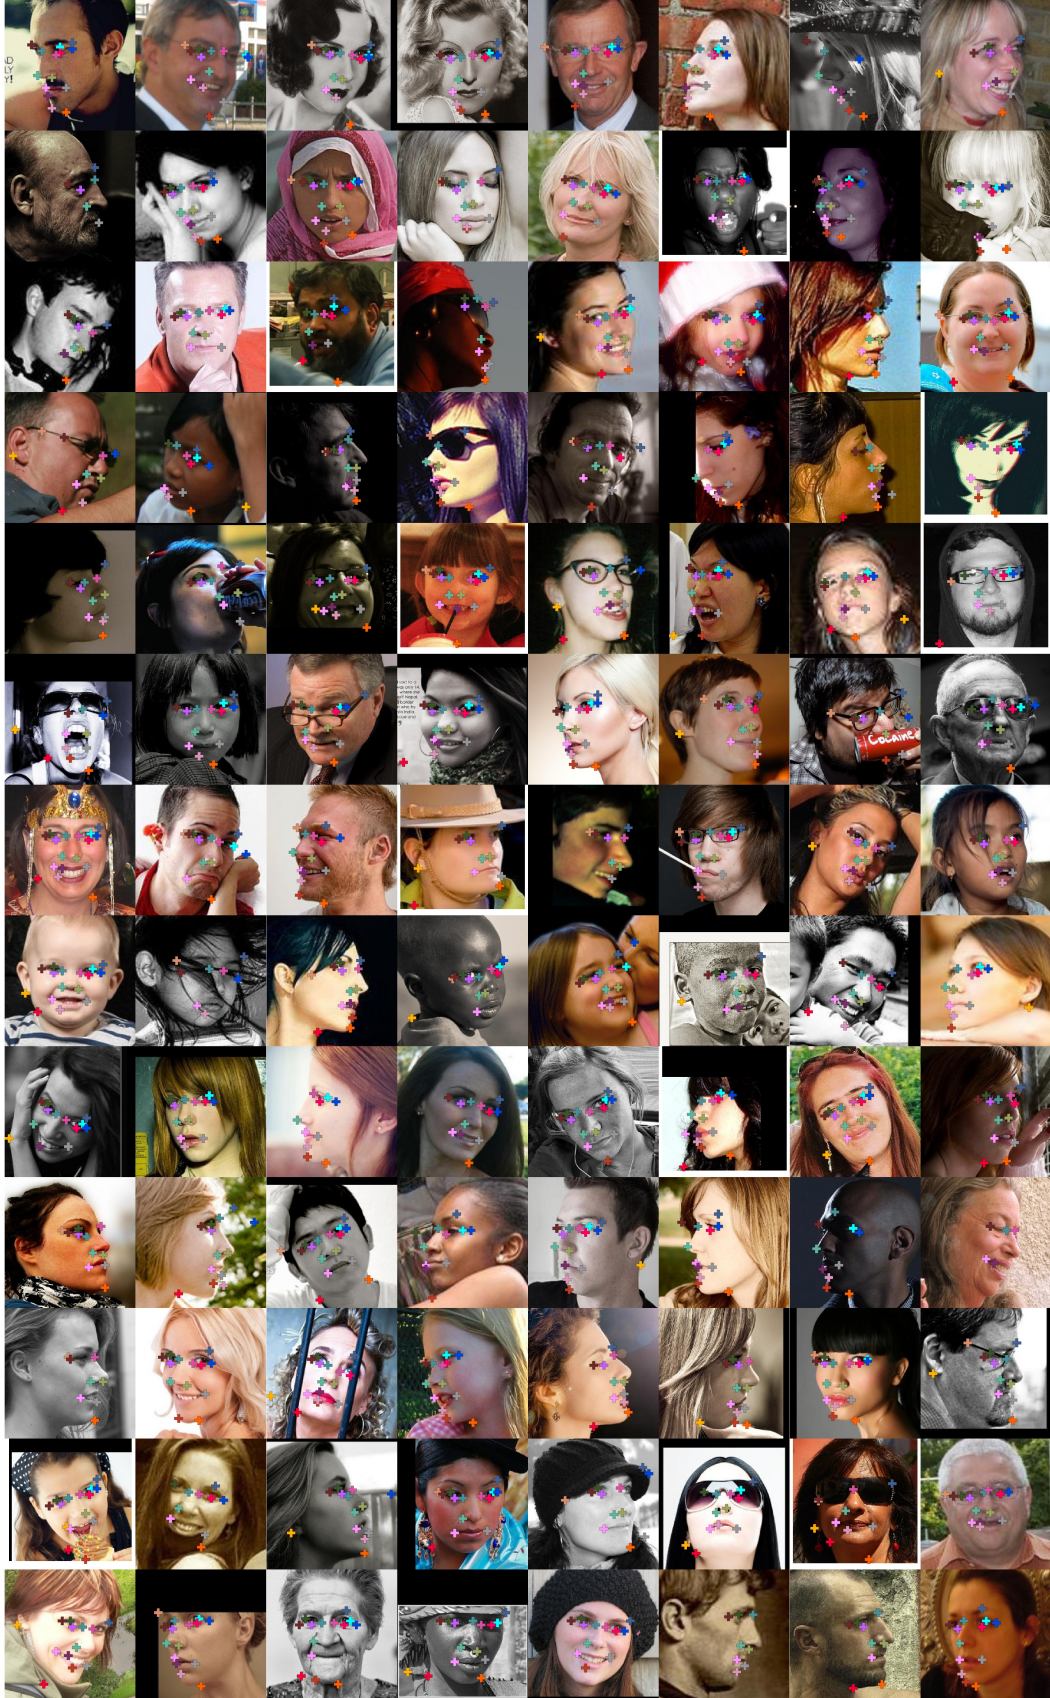

Figure 3: Qualitative results on LS3D



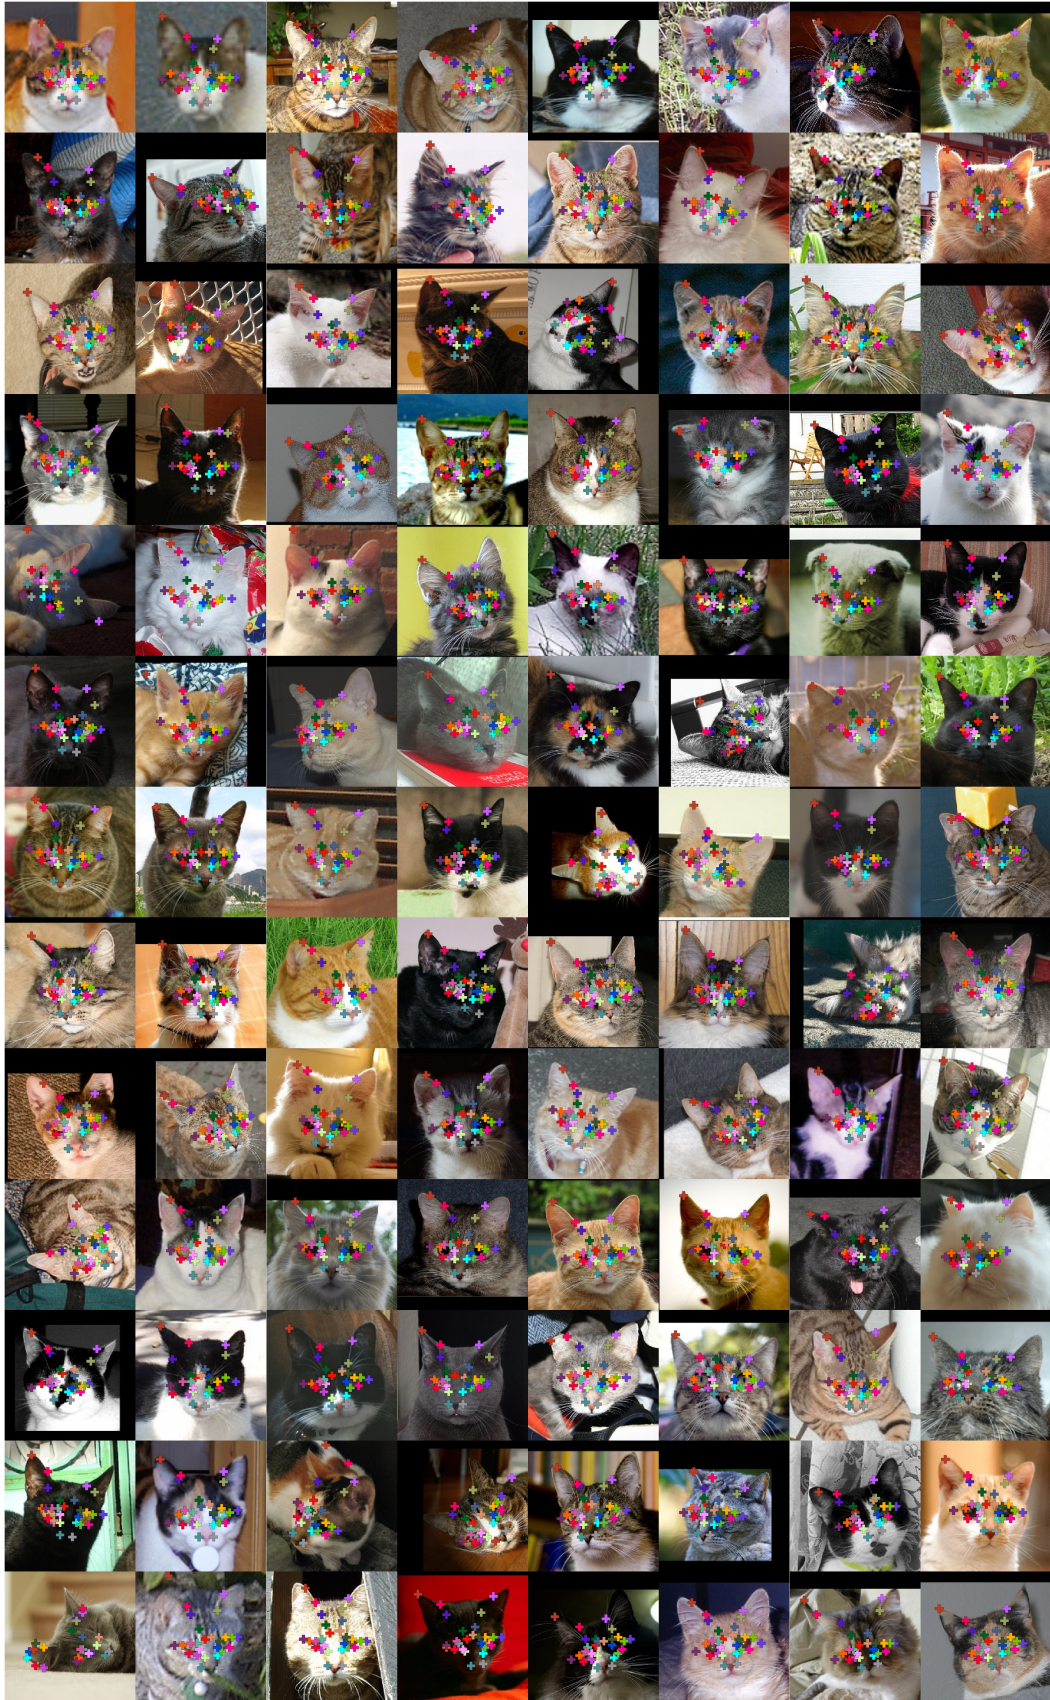

Figure 4: Qualitative results on Cat Heads



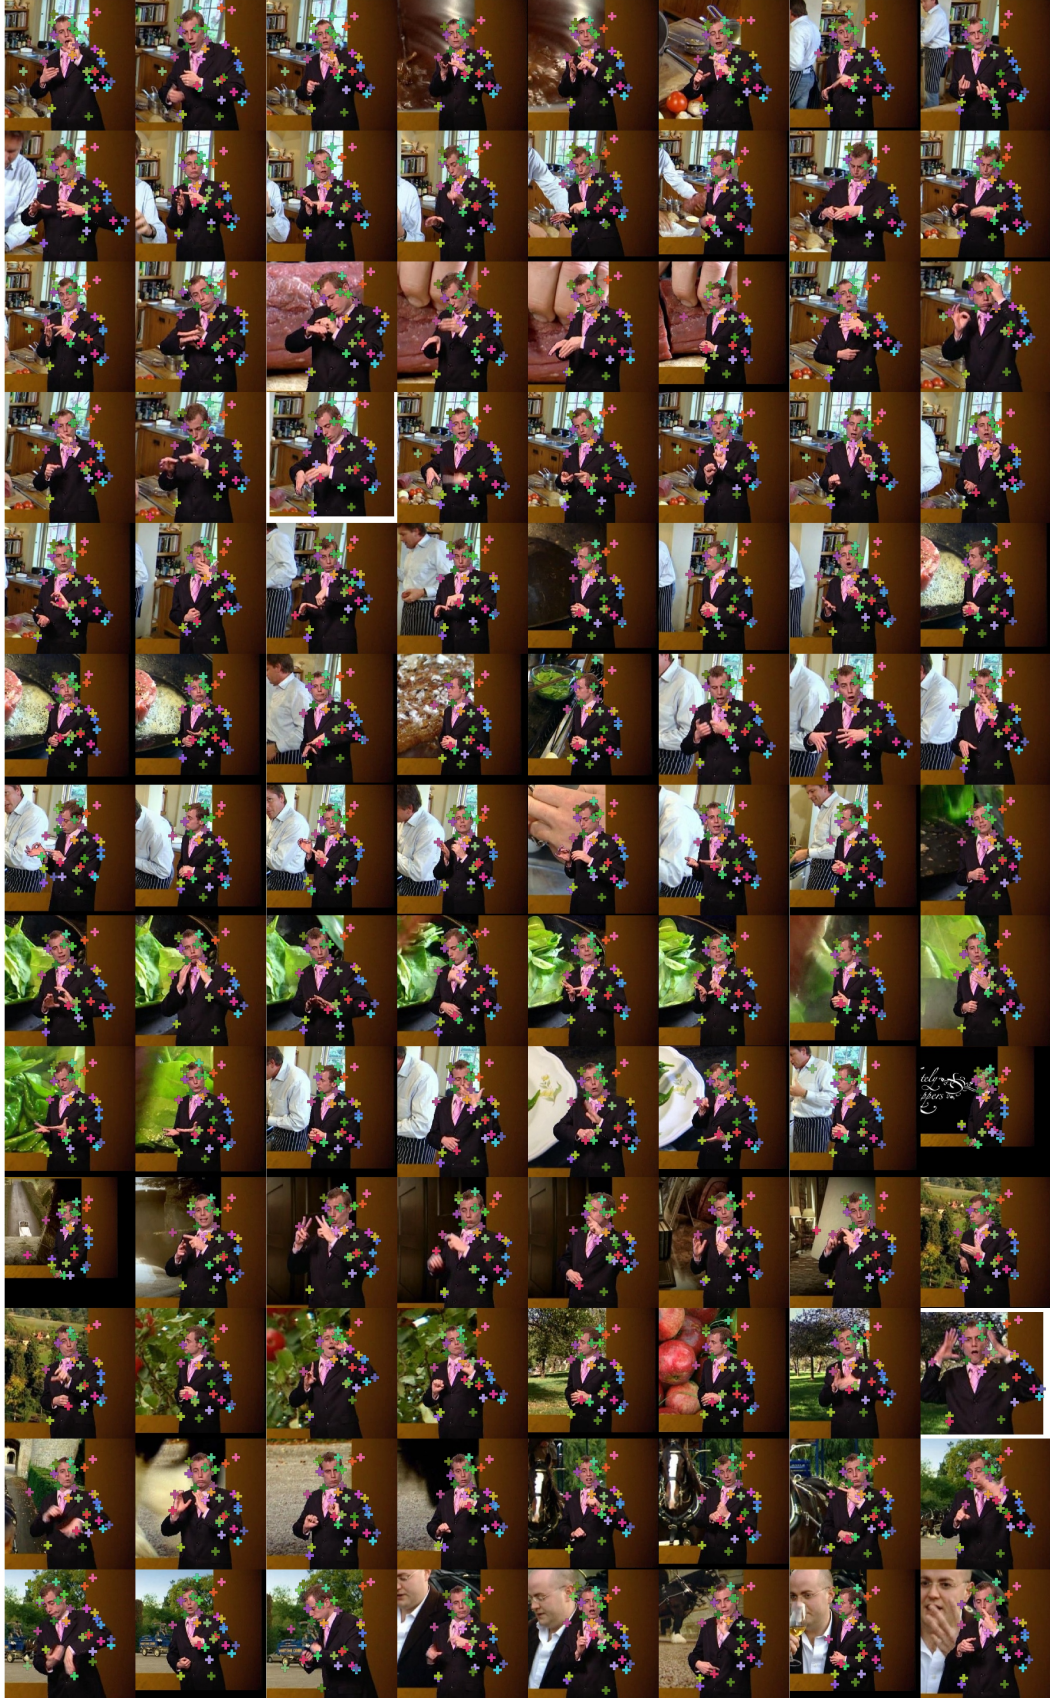

Figure 5: Qualitative results on BBCPose



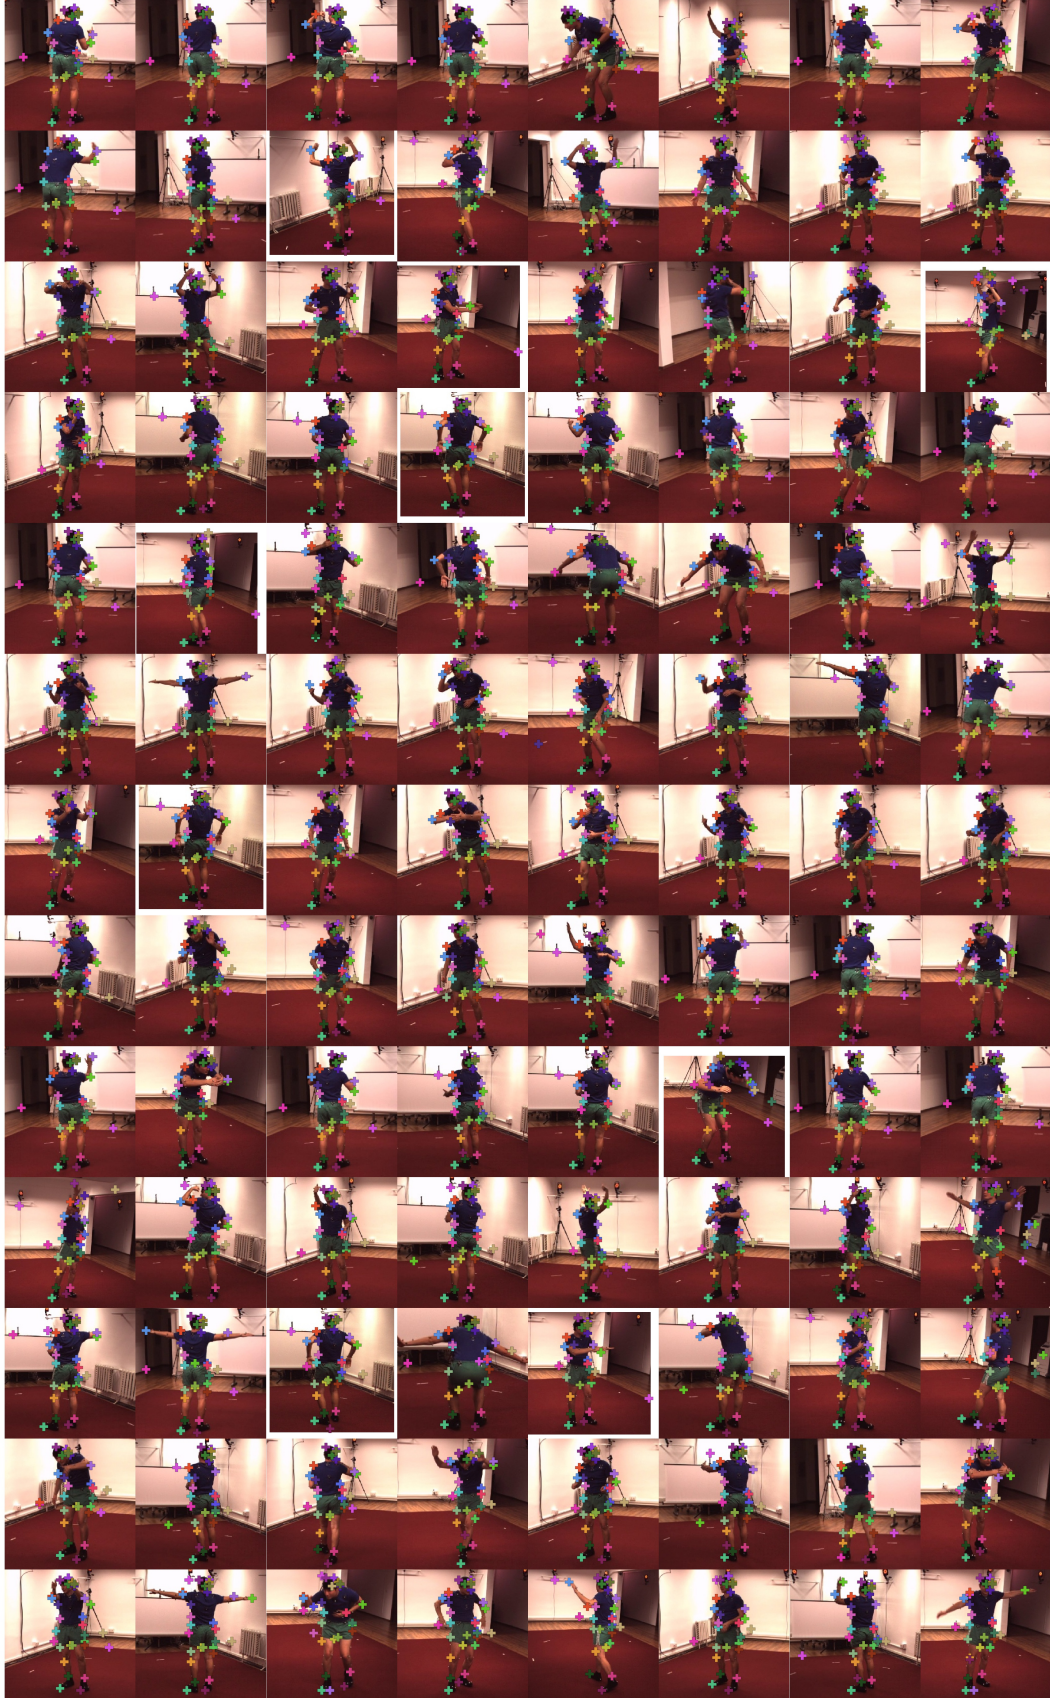

Figure 6: Qualitative results on Human3.6M

## References

- [1] Adrian Bulat and Georgios Tzimiropoulos. How far are we from solving the 2d and 3d face alignment problem? (and a dataset of 230,000 3d facial landmarks). *2017 IEEE International Conference on Computer Vision (ICCV)*, pages 1021–1030, 2017.
- [2] James Charles, Tomas Pfister, Derek R. Magee, David C. Hogg, and Andrew Zisserman. Domain adaptation for upper body pose tracking in signed tv broadcasts. In *BMVC*, 2013.
- [3] Catalin Ionescu, Dragos Papava, Vlad Olaru, and Cristian Sminchisescu. Human3.6m: Large scale datasets and predictive methods for 3d human sensing in natural environments. *IEEE Transactions on Pattern Analysis and Machine Intelligence*, 36:1325–1339, 2014.
- [4] Vidit Jain and Erik G. Learned-Miller. Fddb: A benchmark for face detection in unconstrained settings. 2010.
- [5] Martin Köstinger, Paul Wohlhart, Peter M. Roth, and Horst Bischof. Annotated facial landmarks in the wild: A large-scale, real-world database for facial landmark localization. *2011 IEEE International Conference on Computer Vision Workshops (ICCV Workshops)*, pages 2144–2151, 2011.
- [6] Ziwei Liu, Ping Luo, Xiaogang Wang, and Xiaoou Tang. Deep learning face attributes in the wild. *2015 IEEE International Conference on Computer Vision (ICCV)*, pages 3730–3738, 2015.
- [7] Christos Sagonas, Georgios Tzimiropoulos, Stefanos Zafeiriou, and Maja Pantic. 300 faces in-the-wild challenge: The first facial landmark localization challenge. *2013 IEEE International Conference on Computer Vision Workshops*, pages 397–403, 2013.
- [8] Jie Shen, Stefanos Zafeiriou, Grigoris G. Chrysos, Jean Kossaifi, Georgios Tzimiropoulos, and Maja Pantic. The first facial landmark tracking in-the-wild challenge: Benchmark and results. *2015 IEEE International Conference on Computer Vision Workshop (ICCVW)*, pages 1003–1011, 2015.
- [9] Weiwei Zhang, Jian Sun, and Xiaoou Tang. Cat head detection - how to effectively exploit shape and texture features. In *ECCV*, 2008.
- [10] Yuting Zhang, Yijie Guo, Yixin Jin, Yijun Luo, Zhiyuan He, and Honglak Lee. Unsupervised discovery of object landmarks as structural representations. *2018 IEEE/CVF Conference on Computer Vision and Pattern Recognition*, pages 2694–2703, 2018.
- [11] Xiangyu Zhu, Zhen Lei, Xiaoming Liu, Hailin Shi, and Stan Z Li. Face alignment across large poses: A 3d solution. In *CVPR*, 2016.
